# Supplementary material
Source: PubMed Central journal article supplement (PMC6399607)
Supplement: EMBR-20-e44948-s002.pdf [file EMBR-20-e44948-s002.pdf]

## Expanded View Figures

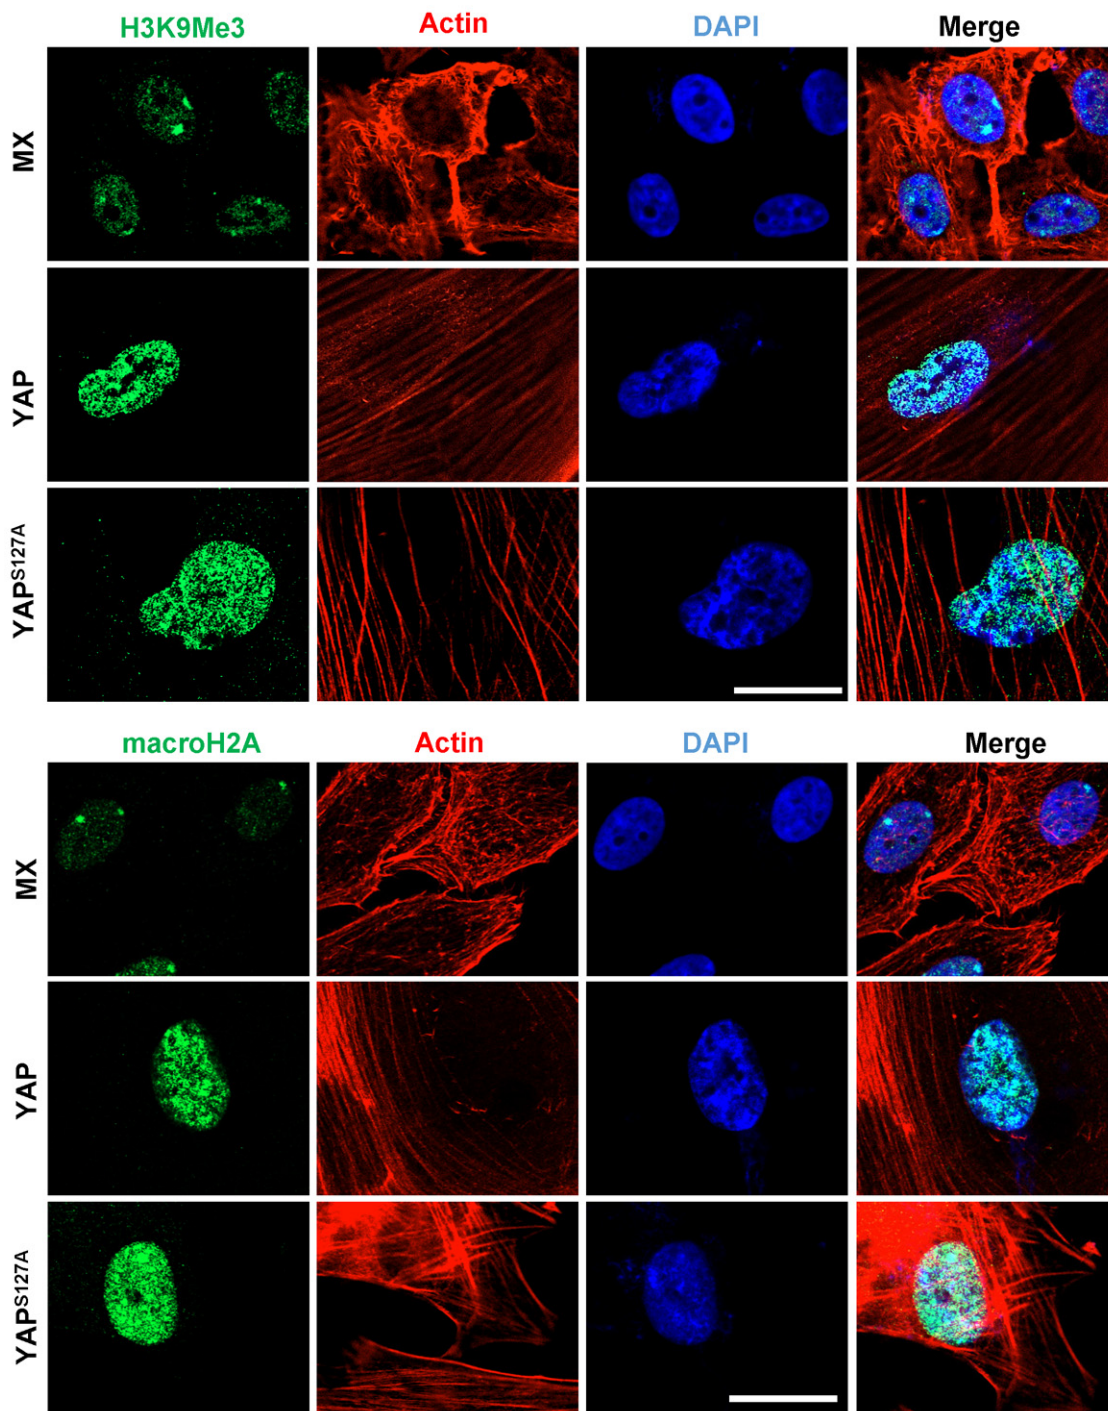

**Figure EV1. YAP1 induced senescence-associated heterochromatin foci (SAHF) in HOSE cells.**

Representative images showing the expression of H3K9Me3 and macroH2A in the seventh passage HOSE cells transfected with empty (MX), wild-type YAP (YAP), or constitutively active YAP (YAP<sup>S127A</sup>) vectors. H3K9Me3 and macroH2A were visualized by an Alexa-488-conjugated secondary antibody (green). Actin filaments were stained with rhodamine-phalloidin (red). Scale bar = 20 μm.

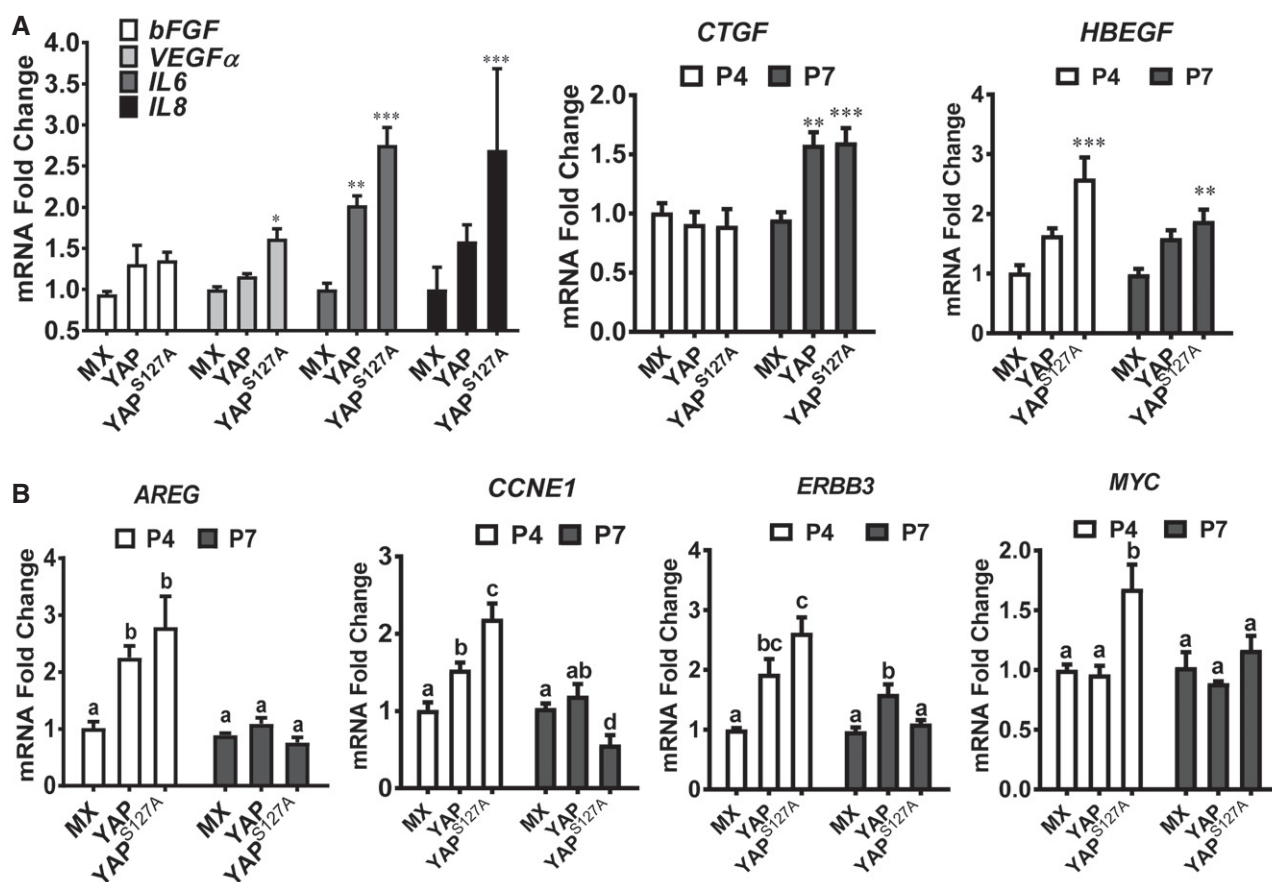

**Figure EV2. YAP induced cellular senescence in HOSE cells.**

**A** Relative mRNA levels of SASP factors (FGF2, VEGFA, IL-6, IL-8, CTGF, and HBEGF) in HOSE-MX cells (HOSEs transfected with empty MXIV vectors), HOSE-YAP cells (HOSEs transfected with vectors expressing wild-type YAP), and HOSE-YAP<sup>S127A</sup> cells (HOSEs transfected with vectors expression constitutively active YAP, indicated as YAP<sup>S127A</sup>) at their 7<sup>th</sup> passage. Relative mRNA levels of CTGF and HBEGF in these cells at their 4<sup>th</sup> passage were also presented. Data were normalized with mRNA levels of GAPDH. Each bar represents mean  $\pm$  SEM ( $n = 4$ ). \* $P < 0.05$ , \*\* $P < 0.01$ , \*\*\* $P < 0.001$ , compared to the MX control cells in the same group.

**B** mRNA expressions of YAP1 target genes (*CCNE1*, *MYC*, *ERBB3*, and *HBEGF*) in HOSE-MX cells, HOSE-YAP cells, and HOSE-YAP<sup>S127A</sup> cells at their 4<sup>th</sup> and 7<sup>th</sup> passages. Data were normalized with mRNA level of GAPDH. Each bar represents mean  $\pm$  SEM ( $n = 4$ ). Bars with different letters are significantly different from each other.

Data information: Data were analyzed for significance using one-way ANOVA with Tukey's *post hoc* tests.

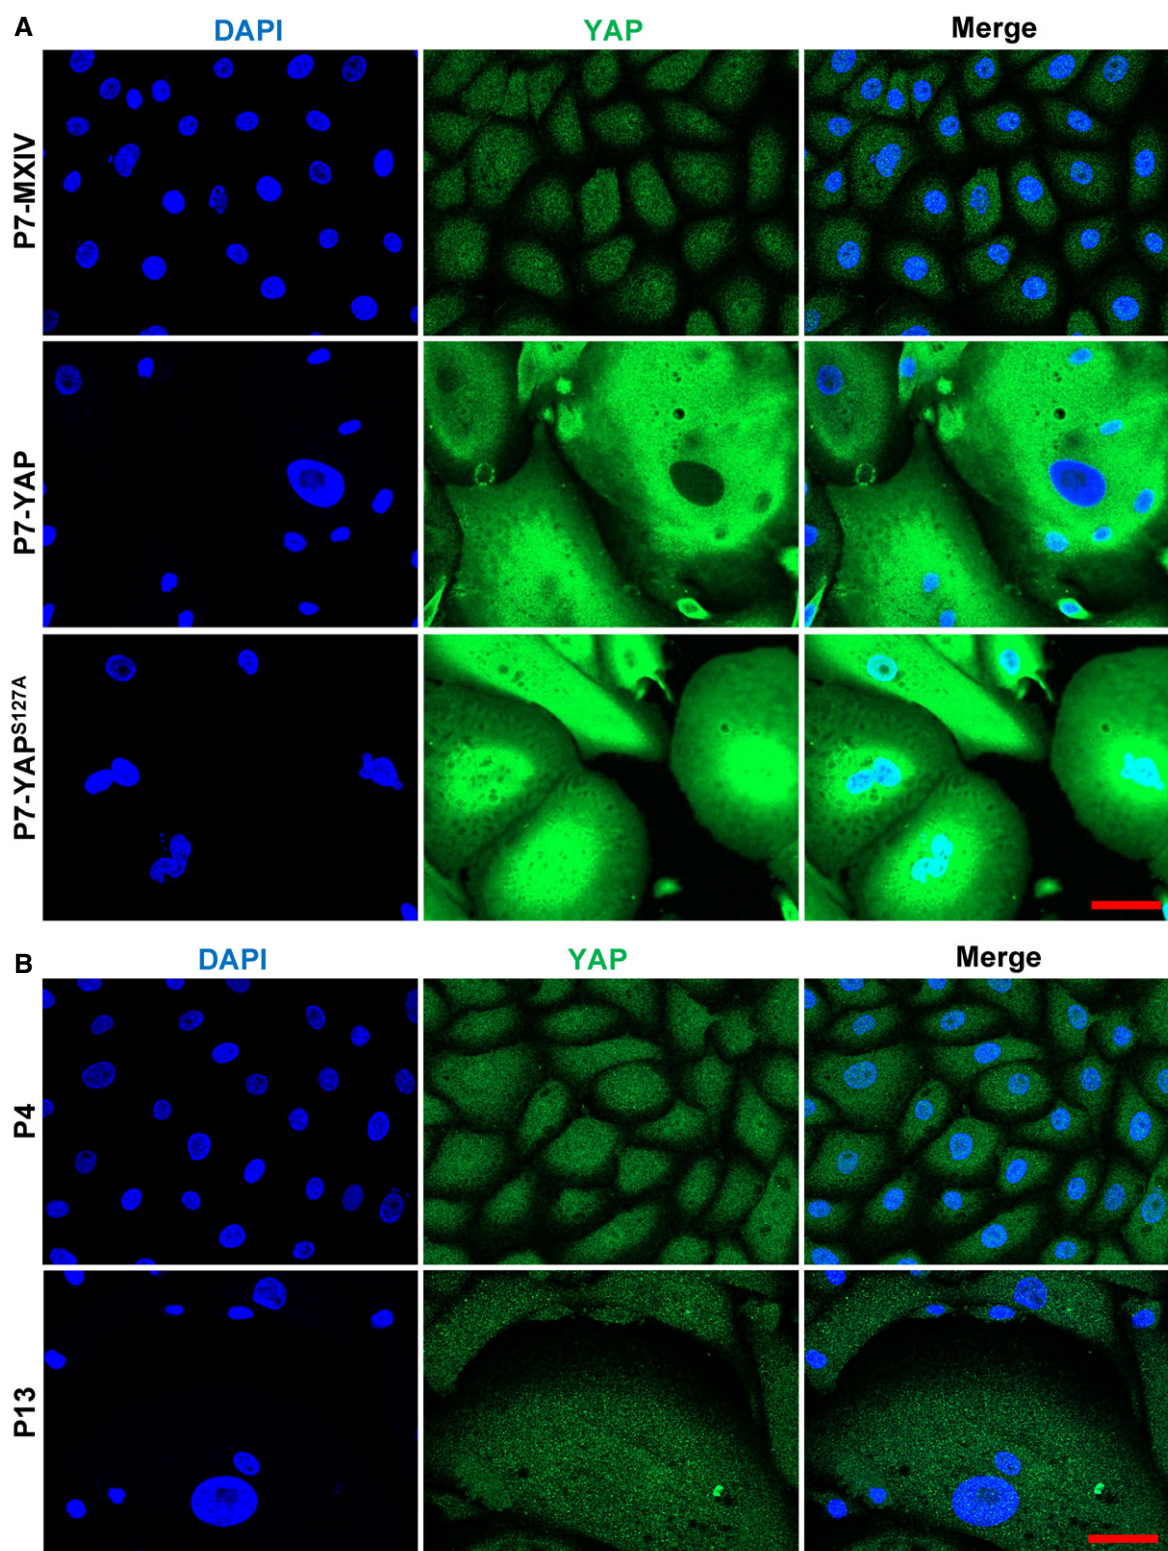

**Figure EV3. YAP activity was suppressed in senescent cells.**

A Representative images showing the expression and location of YAP in HOSE-MXIV, HOSE-YAP, and HOSE-YAP<sup>S127A</sup> cells at the 7<sup>th</sup> passage (P7). Scale bar = 20  $\mu$ m.  
 B Representative images showing the expression and location of YAP in HOSE cells at the 4<sup>th</sup> (P4) and 13<sup>th</sup> (P13) passages. YAP was visualized using an Alexa-488 (green)-conjugated secondary antibody. Nuclei were stained with DAPI (blue). Scale bar = 20  $\mu$ m.

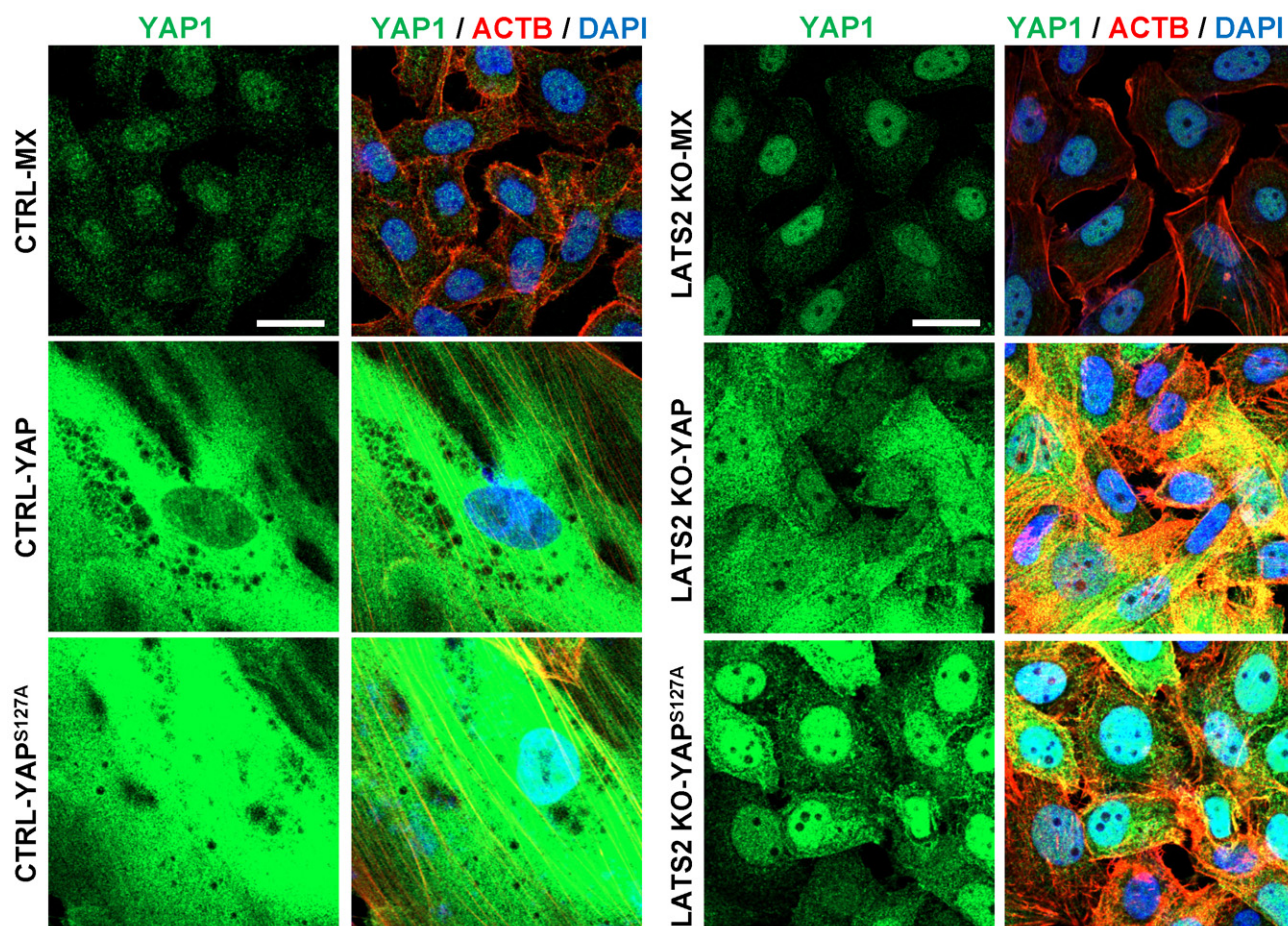

**Figure EV4. LATS2 deletion impeded YAP-induced cellular senescence.**

Representative images showing the expression and location of YAP1 in hOSE-MX, hOSE-YAP, and hOSE-YAP<sup>S127A</sup> cells with or without knockout of LATS2 using CRISPR-LATS2-CAS9 vectors. Cells were fixed and stained at their 7<sup>th</sup> passage. YAP1 was visualized using an Alexa-488-conjugated 2<sup>nd</sup> antibody (green). Actin filaments were stained with rhodamine-phalloidin (red). Nuclei were stained with DAPI (blue). Scale bar = 20 μm.

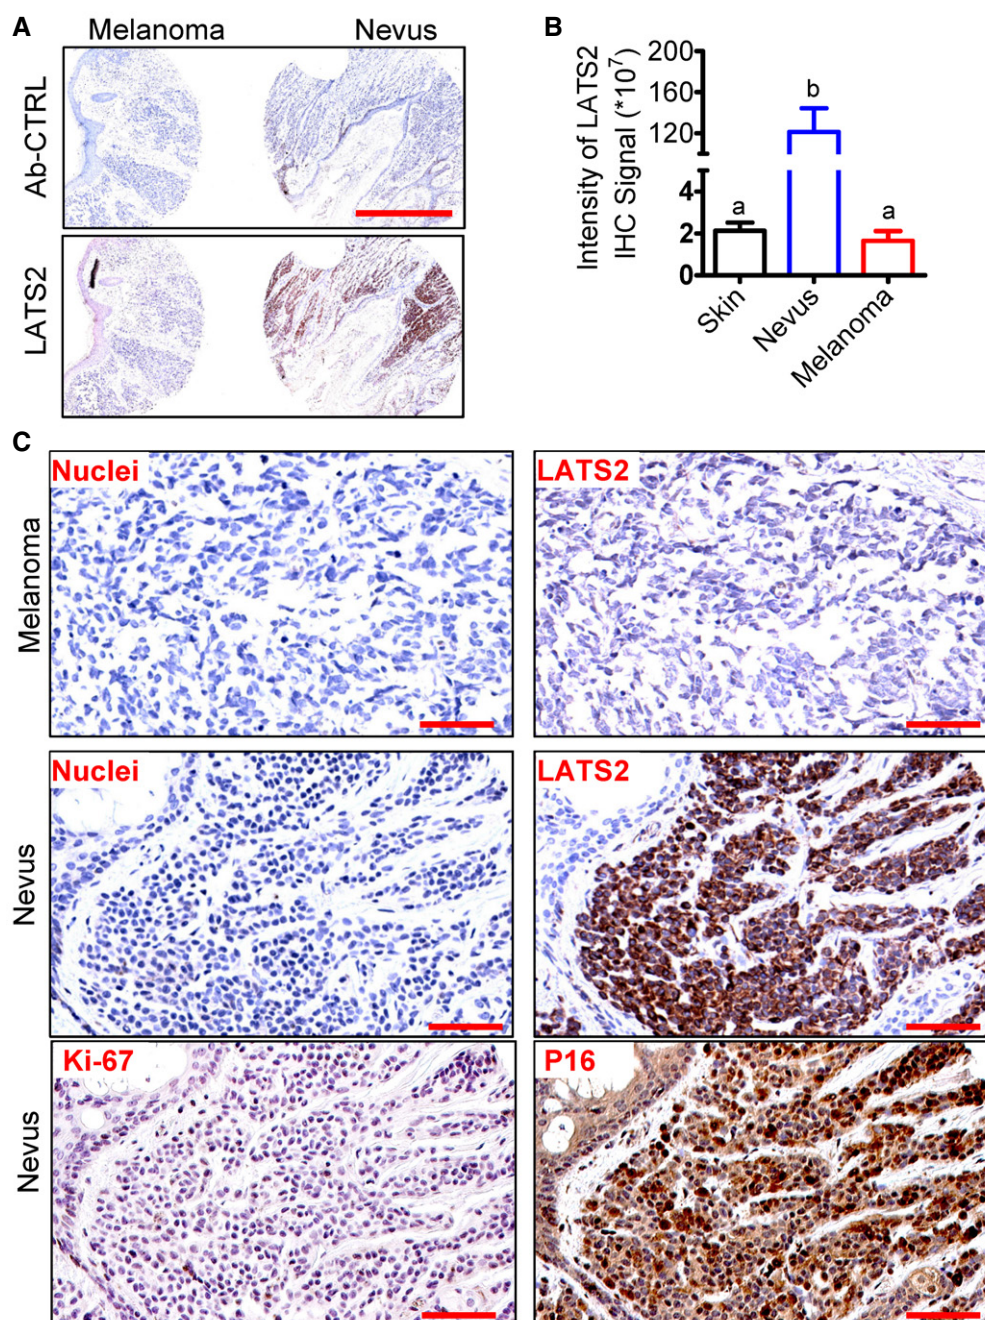

**Figure EV5. LATS2 is up-regulated in human senescent tissues.**

- A** Representative images showing the expression of LATS2 in nevus and melanoma tissues examined by immunohistochemistry. Scale bar: 1.0 mm.
- B** Quantitative data showing the immunosignal intensity of LATS2 in the normal skin ( $n = 8$ ), nevus ( $n = 9$ ), and melanoma tissues ( $n = 8$ ). Each bar represents means  $\pm$  SEM. Bars with different letters are significantly different from each other. Data were analyzed for significance using one-way ANOVA with Tukey's *post hoc* tests.
- C** Representative high-resolution images showing the expression and cellular location of LATS2, Ki67, and p16 (another known senescence marker) in nevus and melanoma tissues. LATS2 and P16 were visualized using a DAB staining kit and shown as brown. Nuclei were stained with hematoxylin (blue). Scale bar: 100  $\mu$ m.
