# Supplementary material
Source: PubMed Central journal article supplement (PMC6399607)

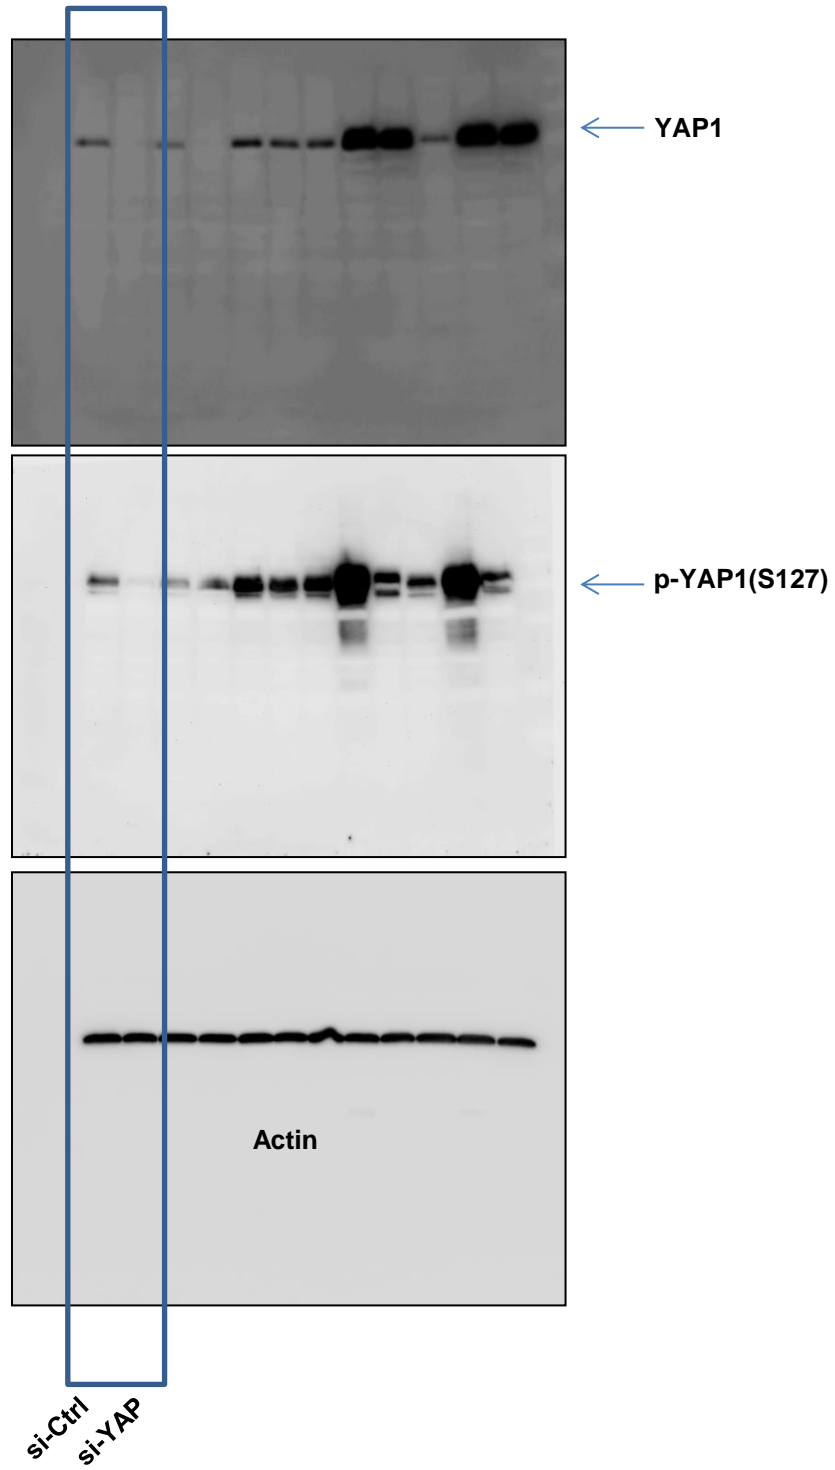

Source Data: Fig. 1A

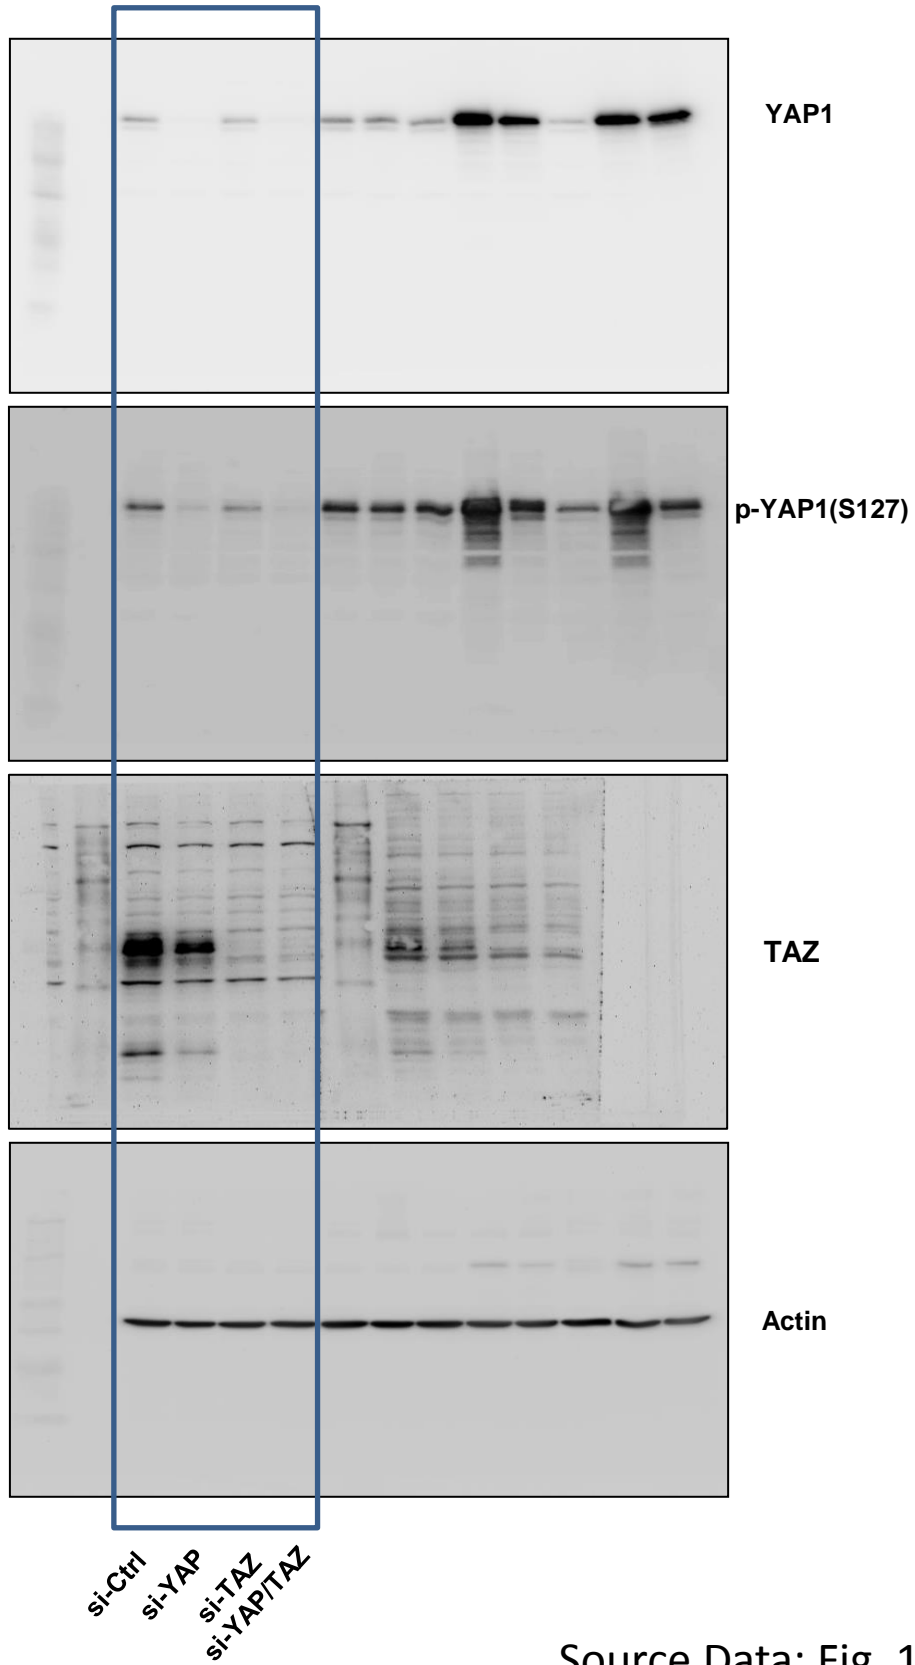

Source Data: Fig. 1B

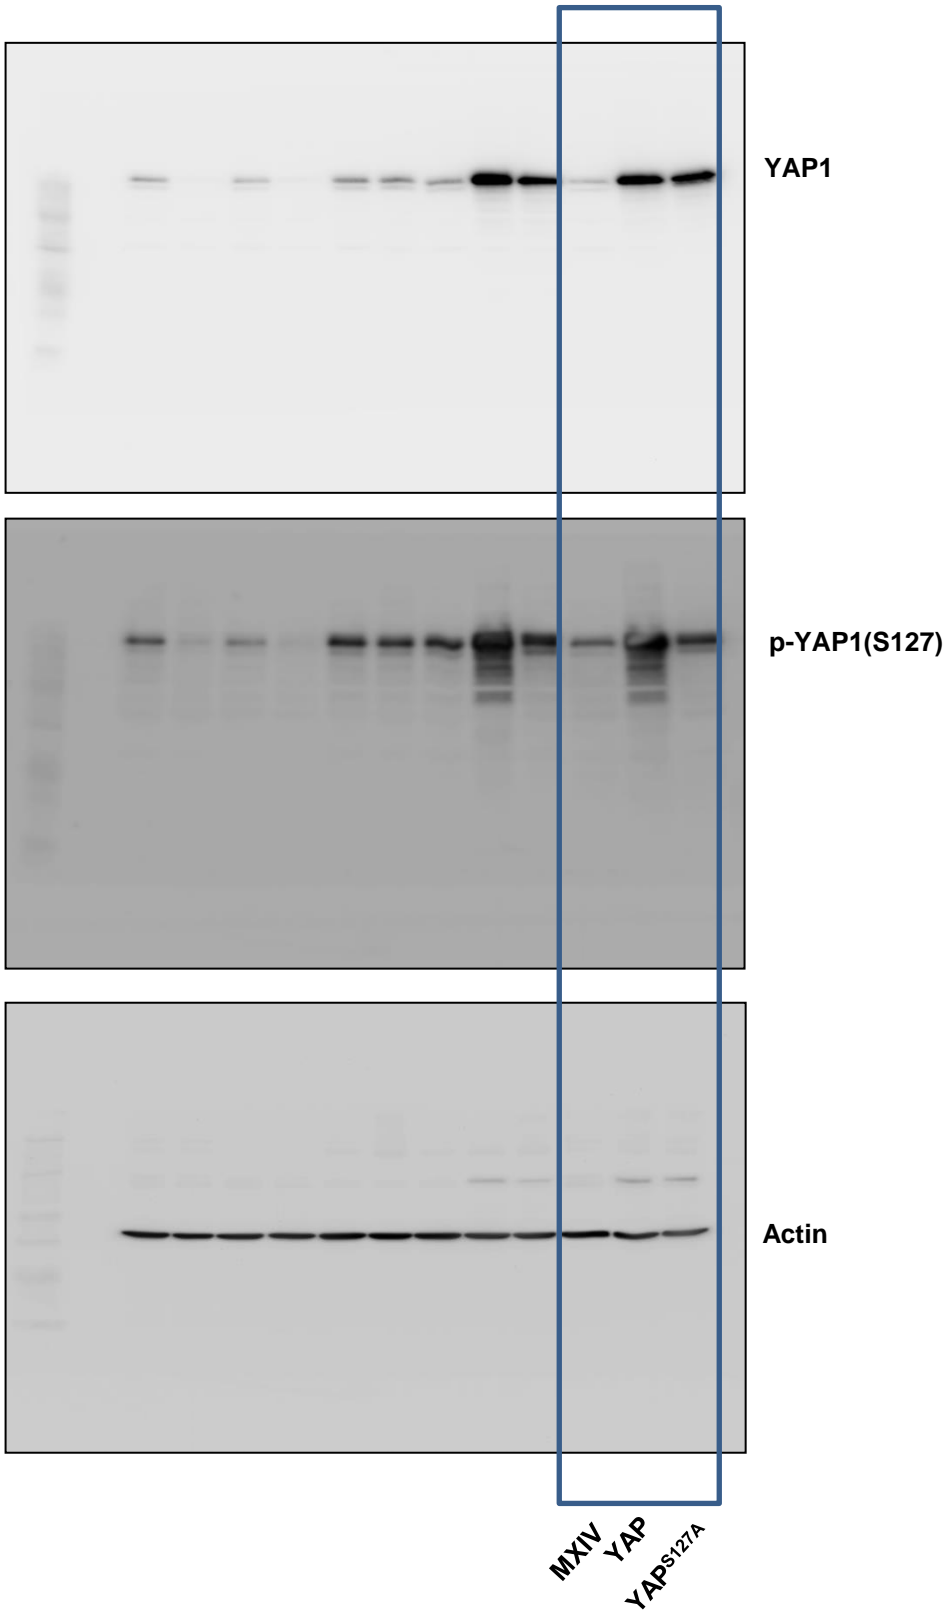

Source Data: Fig. 1C

Supplement: EMBR-20-e44948-s003.pdf [file EMBR-20-e44948-s003.pdf]

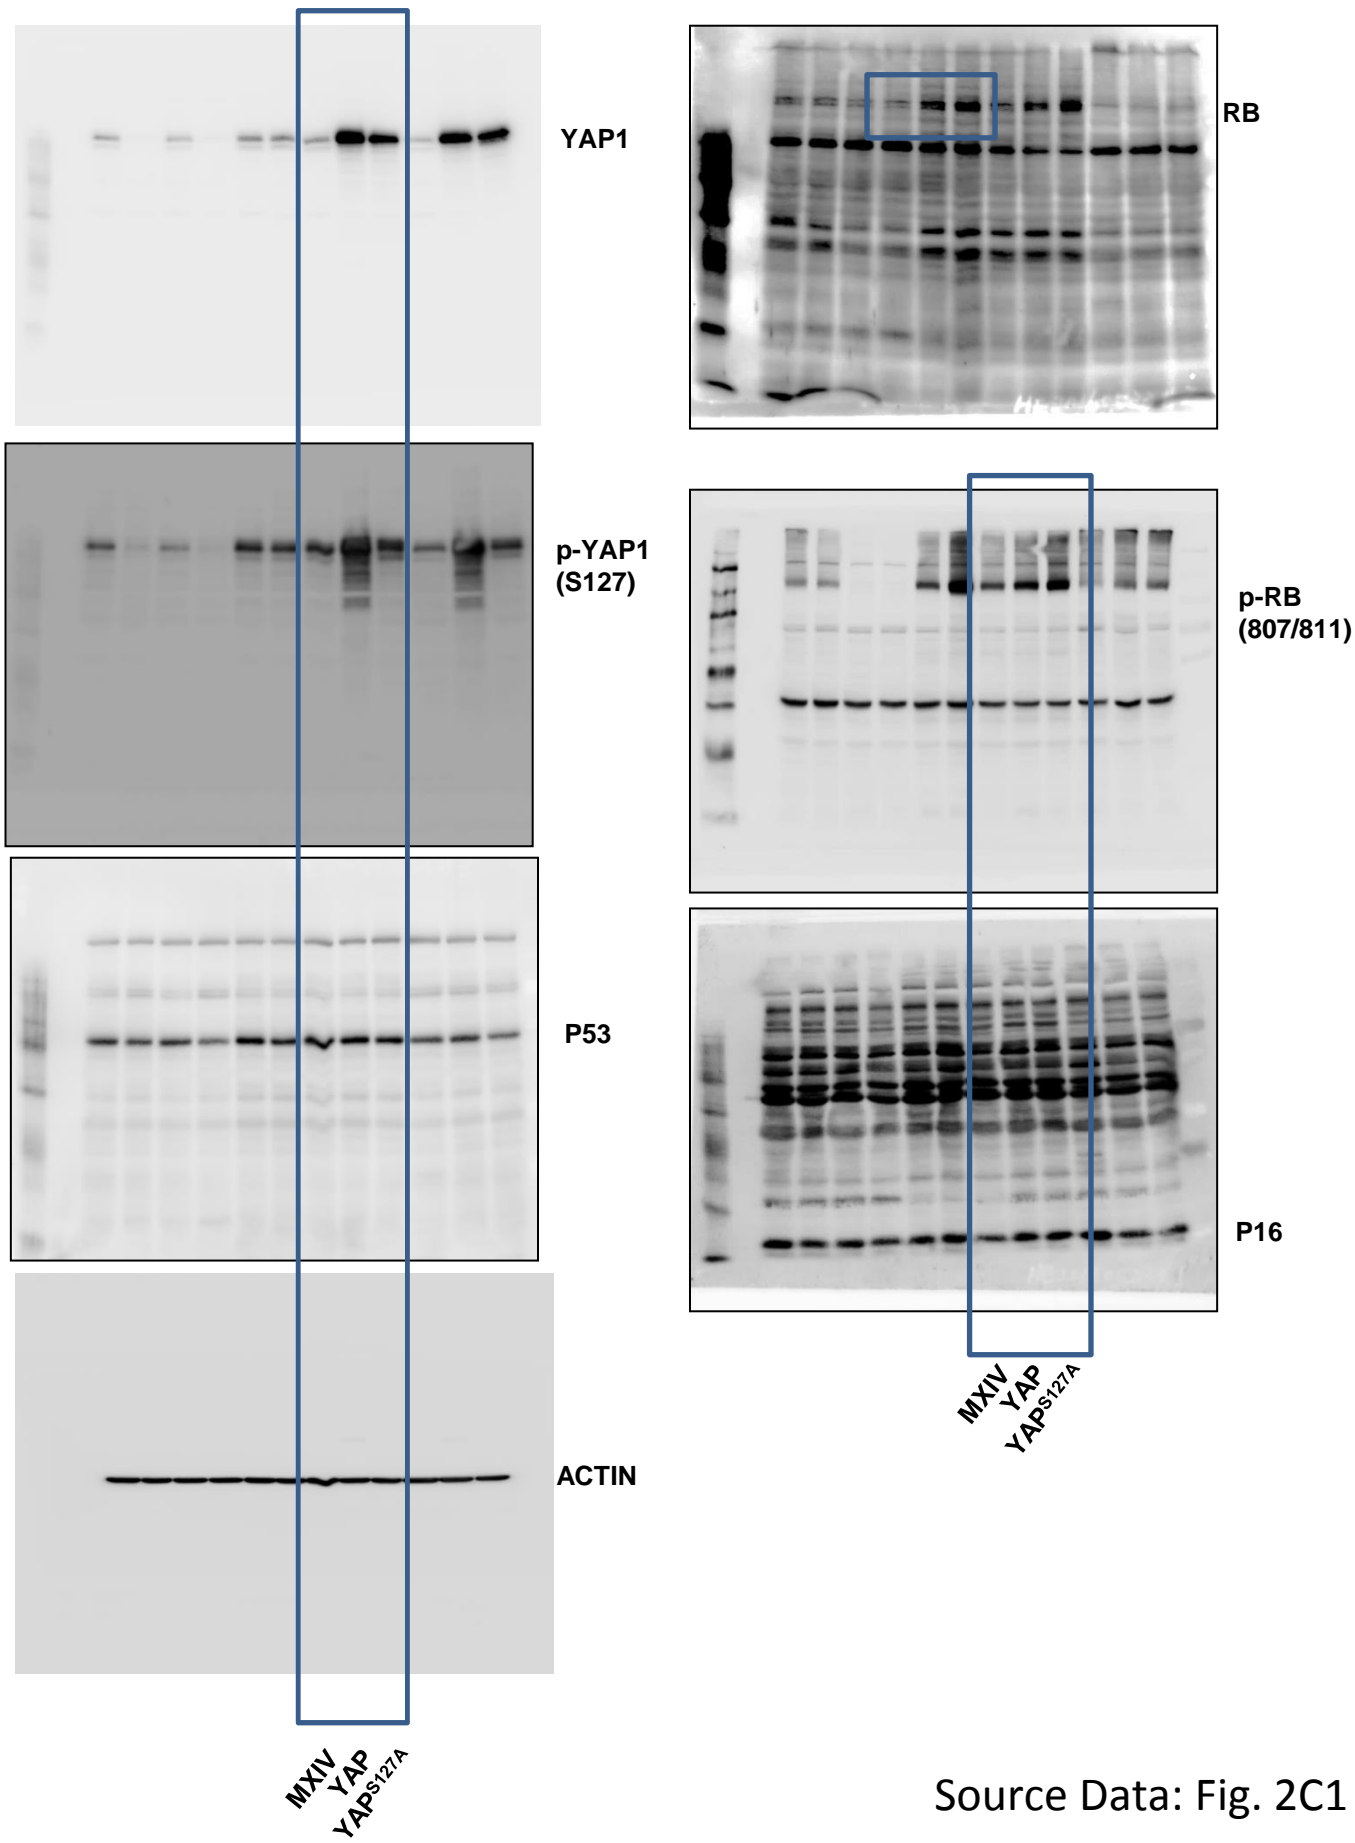

Source Data: Fig. 2C1

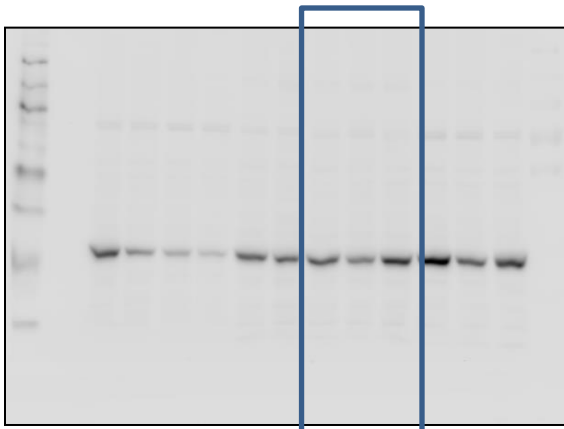

CCND1

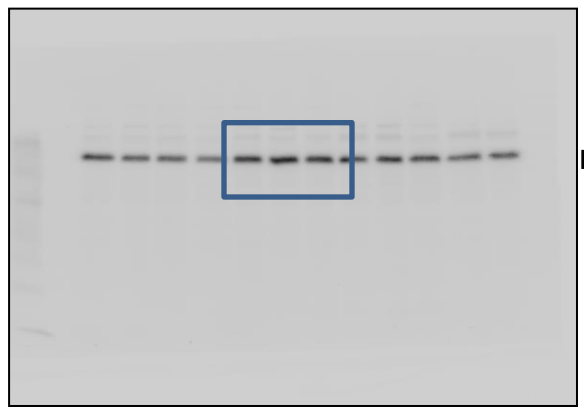

Beclin-1

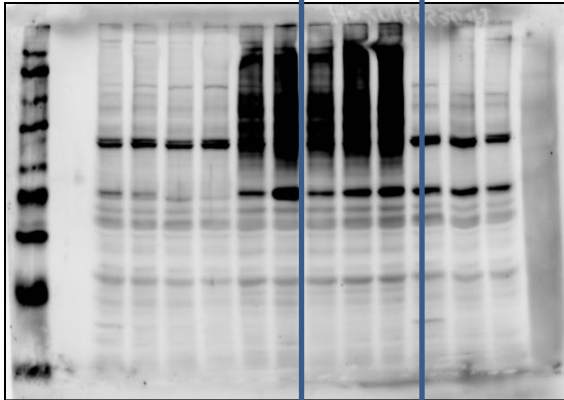

CCNA2

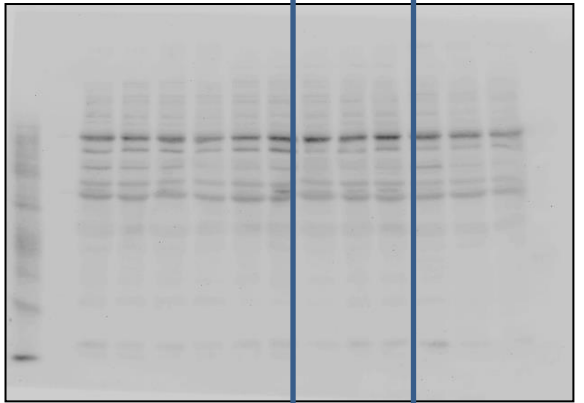

ATG7

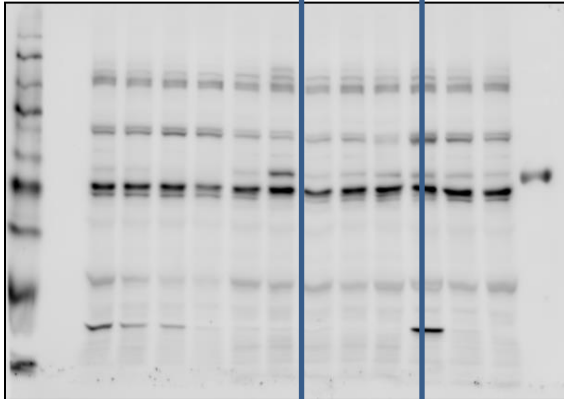

CCNB1

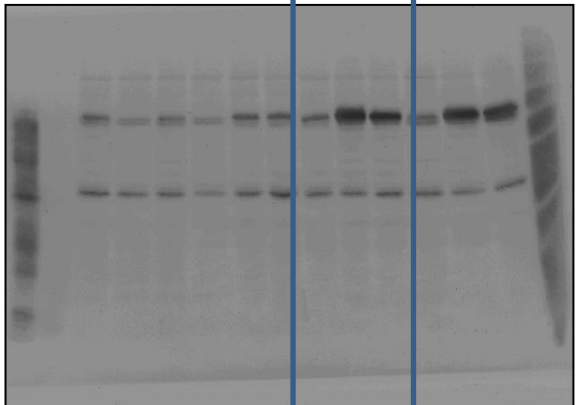

ATG3

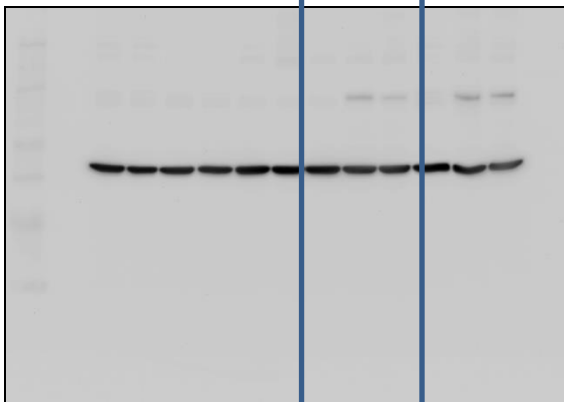

ACTIN

MXIV  
YAP  
YAP<sup>S127A</sup>

MXIV  
YAP  
YAP<sup>S127A</sup>

Supplement: EMBR-20-e44948-s004.pdf [file EMBR-20-e44948-s004.pdf]

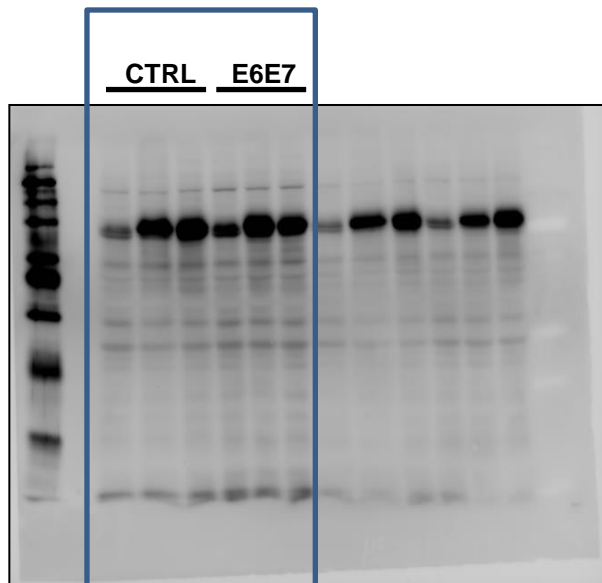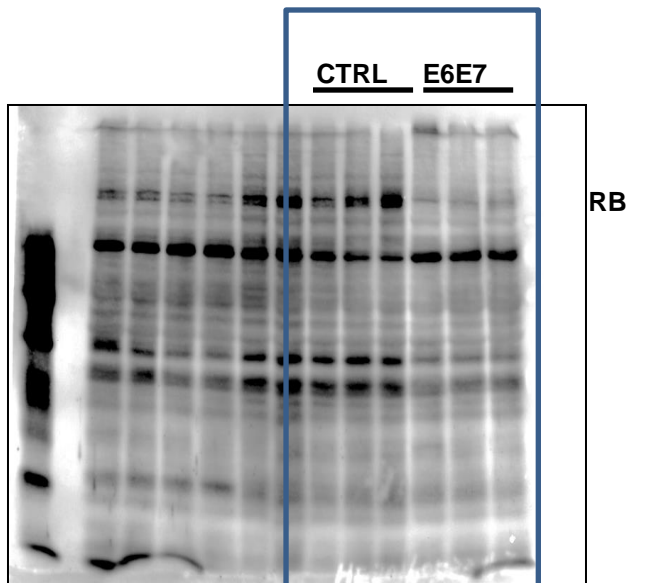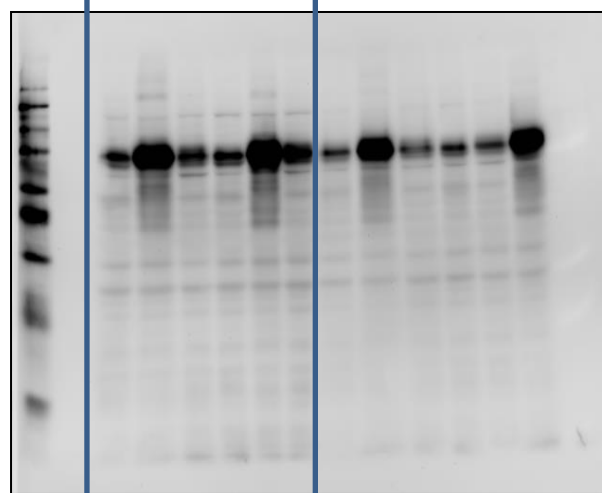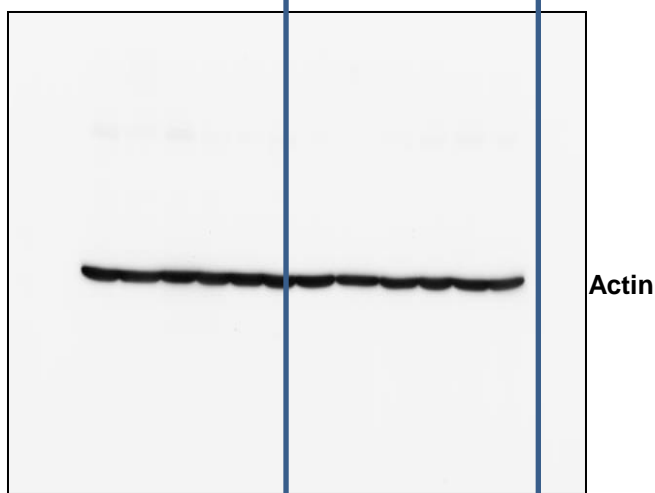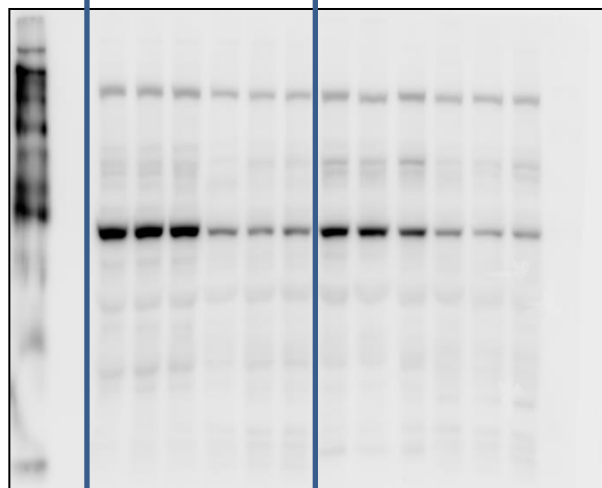

MIXIV  
YAP  
YAP<sup>S127A</sup>  
MIXIV  
YAP  
YAP<sup>S127A</sup>

MIXIV  
YAP  
YAP<sup>S127A</sup>  
MIXIV  
YAP  
YAP<sup>S127A</sup>

Supplement: EMBR-20-e44948-s005.pdf [file EMBR-20-e44948-s005.pdf]

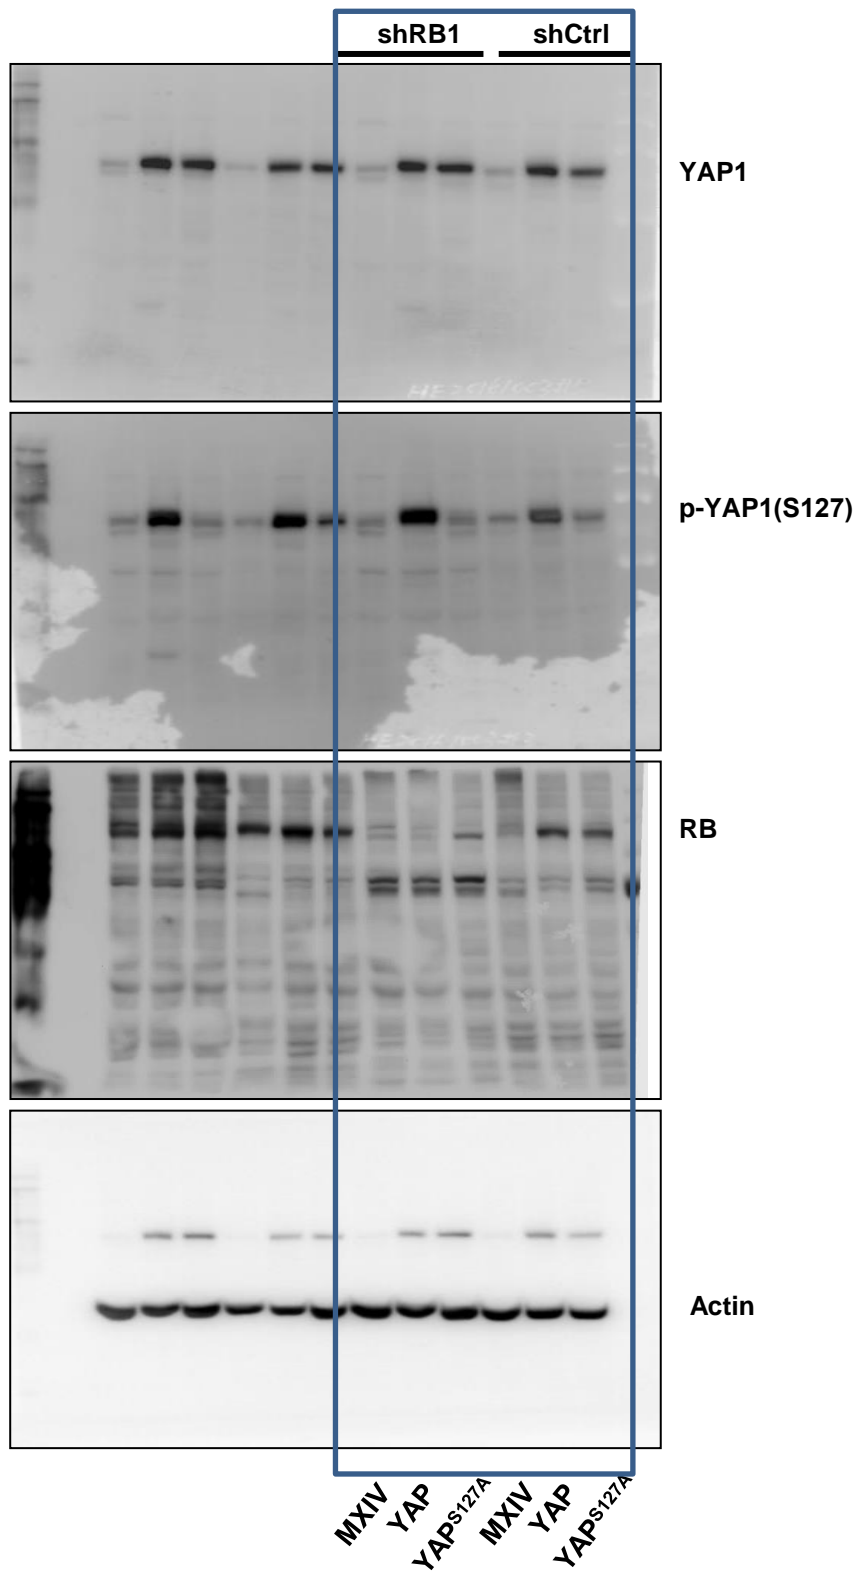

Source Data: Fig. 4A

Supplement: EMBR-20-e44948-s006.pdf [file EMBR-20-e44948-s006.pdf]

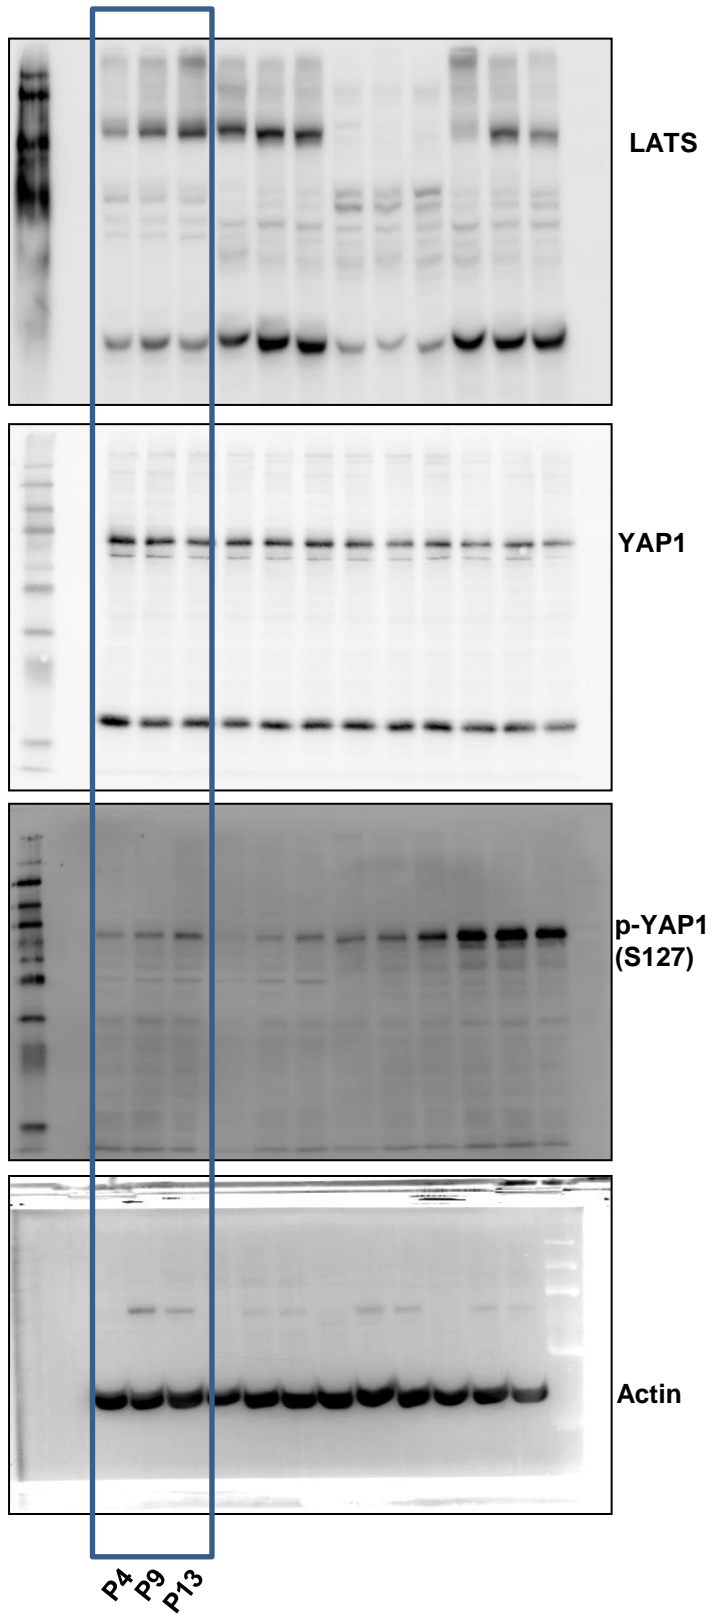

Source Data: Fig. 5A

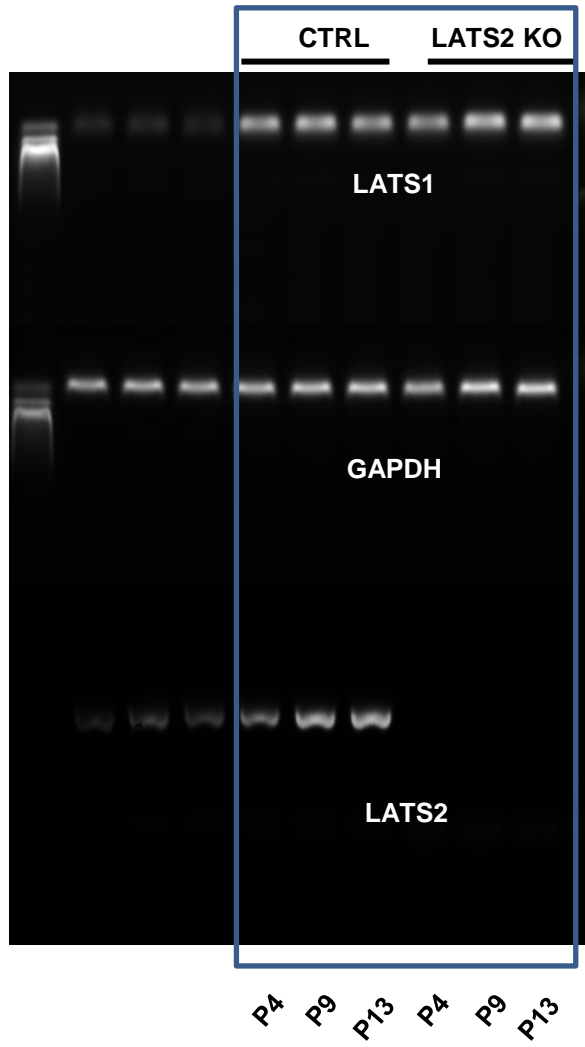

Source Data: Fig. 5B

Supplement: EMBR-20-e44948-s007.pdf [file EMBR-20-e44948-s007.pdf]

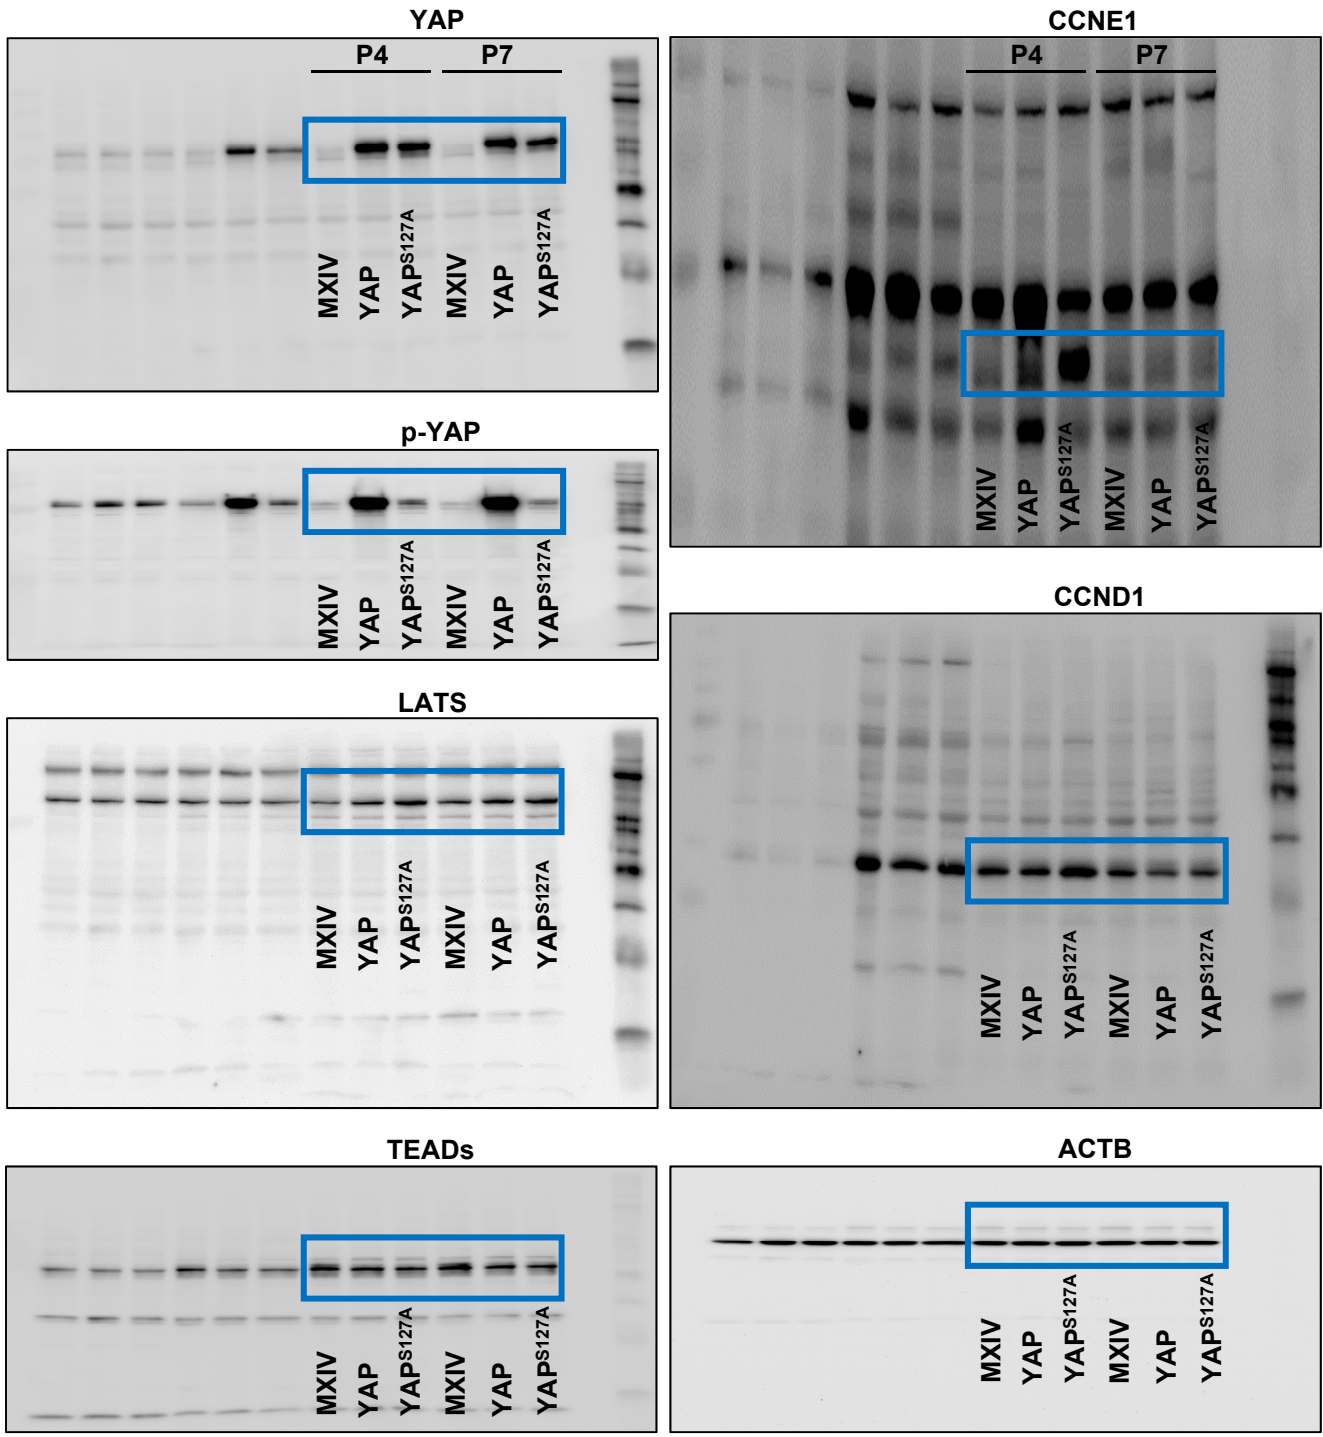

Source Data: Fig. 6A

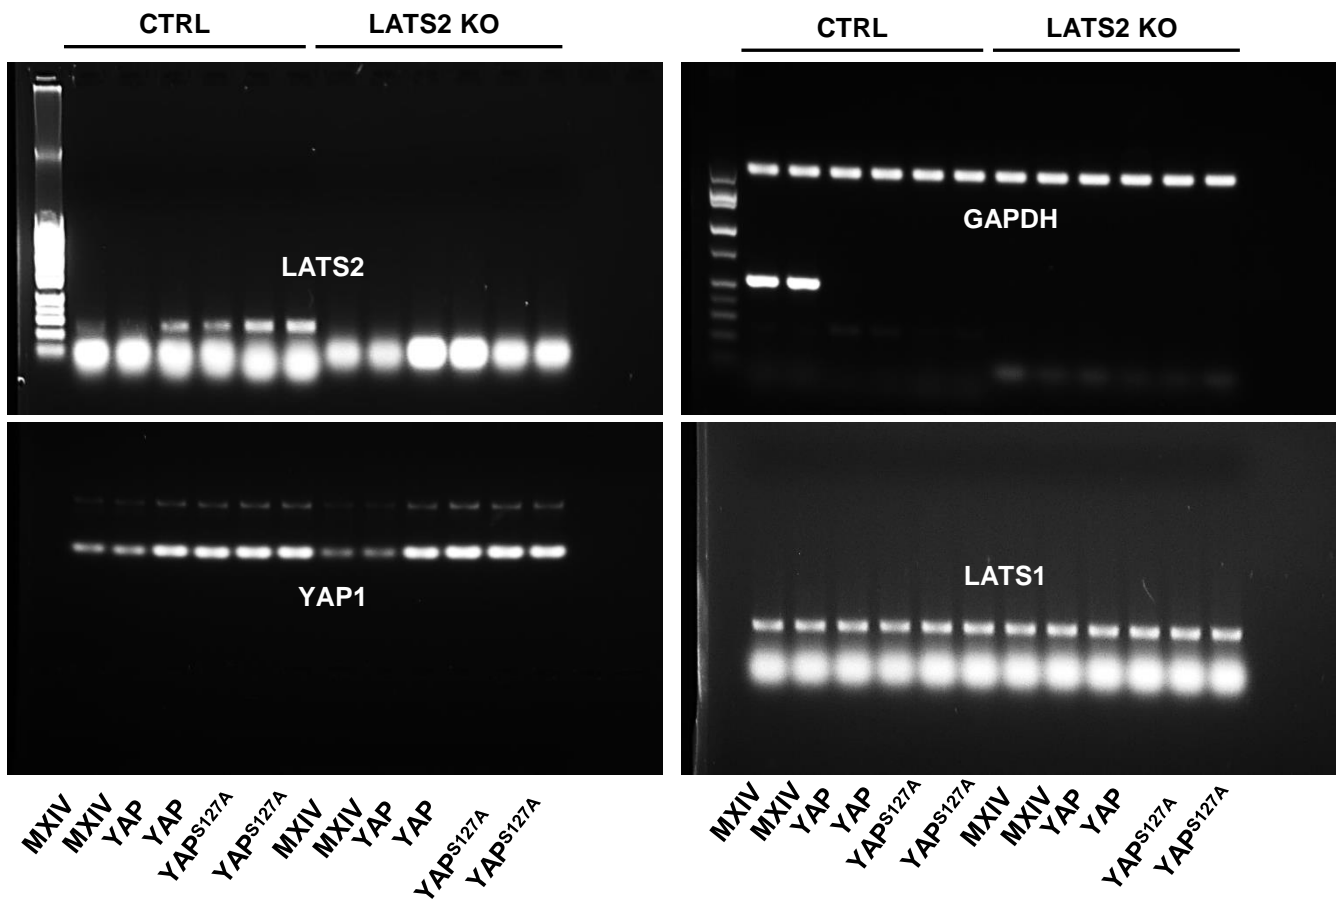

Source Data: Fig. 6B

Supplement: EMBR-20-e44948-s008.pdf [file EMBR-20-e44948-s008.pdf]
